# Supplementary material
Source: PubMed Central journal article supplement (PMC5103091)
Supplement: AEM.02186-16_zam999117543so1.pdf [file AEM.02186-16_zam999117543so1.pdf]

1 **Supplementary Material**

2 **Crz1p regulates pH homeostasis in *Candida glabrata* by altering membrane lipid**  
3 **composition**

4 **Dongni Yan<sup>a,b</sup>, Xiaobao Lin<sup>a,b</sup>, Yanli Qi<sup>a,b</sup>, Hui Liu<sup>a,b</sup>, Xiulai Chen<sup>a,b</sup>, Liming**  
5 **Liu<sup>a,b,c#</sup> and Jian Chen<sup>b</sup>.**

6 **Running title:** *CgCrz1p regulates pH homeostasis in C. glabrata*

7 <sup>a</sup> State Key Laboratory of Food Science and Technology, Jiangnan University, 1800  
8 Lihu Road, Wuxi, Jiangsu 214122, China

9 <sup>b</sup> The Key Laboratory of Industrial Biotechnology, Ministry of Education, Jiangnan  
10 University, 1800 Lihu Road, Wuxi, Jiangsu 214122, China

11 <sup>c</sup> Laboratory of Food Microbial-Manufacturing Engineering, Jiangnan University,  
12 1800 Lihu Road, Wuxi, Jiangsu 214122, China

13 <sup>#</sup> Address correspondence to Liming Liu (E-mail address: [mingll@jiangnan.edu.cn](mailto:mingll@jiangnan.edu.cn))

14 Tel: +86-0510-85197875;

15 Fax: +86-0510-85197875.

16 Postal address: State Key Laboratory of Food Science and Technology, Jiangnan  
17 University, 1800 Lihu Road, Wuxi 214122, China.

18

19

20

21

22

## 23 **1. Supplementary Data**

24 **Spreadsheet 1.** Up-regulated genes in the wild-type and *Cgcrz1Δ* strains in YNB-pH  
25 2.0 medium, respectively, compared with that of the wild-type and *Cgcrz1Δ* strains in  
26 YNB-pH 6.0 medium.

27 **Spreadsheet 2.** Down-regulated genes in the wild-type and *Cgcrz1Δ* strains in  
28 YNB-pH 2.0 medium, respectively, compared with that of the wild-type and *Cgcrz1Δ*  
29 strains in YNB-pH 6.0 medium.

30 **Spreadsheet 3.** Up-regulated genes in the *Cgcrz1Δ* mutant strain, compared with the  
31 wild-type strain in YNB-pH 6.0 and YNB-pH 2.0 medium.

32 **Spreadsheet 4.** Down-regulated genes in the *Cgcrz1Δ* mutant strain, compared with  
33 the wild-type strain in YNB-pH 6.0 and YNB-pH 2.0 medium.

34 **Spreadsheet 5.** Regulated differentially genes in the *Cgcrz1Δ* mutant strain compared  
35 with the wild-type strain in YNB-pH 2.0 medium in KEGG database (with map).

### 36 **1.1 Supplementary Description**

37 **The detailed description of the transformation protocol for *C. glabrata*:**

38 *C. glabrata* ATCC 55 competent cells for electroporation were prepared by an  
39 improved method that uses an extra treatment with lithium acetate and dithiothreitol  
40 (1). The electroporation-competent cells were mixed with 1 μg of the flanking PCR  
41 fragment in 10 μL of water, transferred to a 0.2-cm gap cuvette, and incubated for 5  
42 min on ice. For construction of  $\Delta crz1$  mutants, the flanking PCR fragment was  
43 transformed into a  $\Delta$ HTU strain obtained in this study.

44 The electroporation pulse was applied at 1.5 kV for 5 ms using a GenPulser

45 Xcell™ electroporation system (BioRad, Hercules, CA) (1). The electroporated cells  
 46 were immediately diluted with 1 mL of ice-cold 1 mol L<sup>-1</sup> sorbitol and cultured under  
 47 30 °C for 4 h. For  $\Delta crz1$  transformation, 200  $\mu$ L aliquots were spread on YNB  
 48 supplemented with moderate uracil and tryptophan plates to identify the histidine  
 49 marker mutants.

## 50 2. Supplementary Figures and Tables

### 51 2.1. Supplementary Tables

52 **Table S1 Strains used in this study**

| Strain                                 | Genotype                                                                                                                                                                | Source or reference |
|----------------------------------------|-------------------------------------------------------------------------------------------------------------------------------------------------------------------------|---------------------|
| <i>C.glabrata</i> ATCC 2001            | Wild-type strain                                                                                                                                                        | (2)                 |
| <i>C.glabrata</i> $\Delta$ HTU         | <i>his3</i> $\Delta$ <i>trp</i> $\Delta$ <i>ura3</i> $\Delta$                                                                                                           | (2)                 |
| <i>Cgcrz1</i> $\Delta$                 | <i>his3</i> $\Delta$ <i>trp</i> $\Delta$ <i>ura3</i> $\Delta$ <i>crz1</i> $\Delta$ :: <i>CgHIS3</i>                                                                     | This study          |
| <i>Cgcrz1</i> $\Delta$ / <i>CgCRZ1</i> | <i>his3</i> $\Delta$ <i>trp</i> $\Delta$ <i>ura3</i> $\Delta$ <i>crz1</i> $\Delta$ :: <i>CgHIS3</i><br><i>CgCRZ1</i> :: <i>URA3</i> (PY26/ <i>Bam</i> HI- <i>Stu</i> I) | This study          |
| $\Delta$ HTU/PY26                      | <i>his3</i> $\Delta$ <i>trp</i> $\Delta$ <i>ura3</i> $\Delta$ :: <i>URA3</i> (PY26)                                                                                     | This study          |
| <i>Cgcrz1</i> $\Delta$ /PY26           | <i>his3</i> $\Delta$ <i>trp</i> $\Delta$ <i>ura3</i> $\Delta$ <i>crz1</i> $\Delta$ :: <i>CgHIS3</i> :: <i>URA3</i> (PY26)                                               | This study          |

53

54 **Table S2 The lists of primer sequences for gene knock-out frame construction**

| Gene                   | Primer | Sequences (5'→ 3')                                    |
|------------------------|--------|-------------------------------------------------------|
| <i>Cgcrz1</i> $\Delta$ |        |                                                       |
| CRZ1 Left Arm          | Con-LS | ATTAGTAGCGATAACGAGTTGGACG                             |
|                        | Con-LA | <u>ACCCTCTTAACAAACGCCAT</u> TGCTGAATATTGCAAAATCTTGT   |
| Marker HIS3            | Con-HS | <u>TACAAGATTTTGCAATATTCAGCAAT</u> GGCGTTTGTTAAGAGGGTT |
|                        | Con-HA | ATACTGGAGGTTTGTGTTAATCTATGCTAGGACACCCTTAGTGG          |
| CRZ1 Right Arm         | Con-RS | <u>CCACTAAGGGTGTCC</u> TAGCATAGATTAACACAAACCTCCAGTATT |
|                        | Con-RA | GCAACCCCTTATTTCCCTTAGAT                               |

55 “—” represented sequences of regions flanking of target gene.

56

57 **Table S3 Primer sequences for gene knock-out verification**

| Stains         | Primer     | Sequences (5' → 3')   |
|----------------|------------|-----------------------|
| <i>Cgcrz1Δ</i> | CRZ1-Ver-S | TGGCACATATGCCTCGATGTA |
|                | CRZ1-Ver-A | TTGTCTTAAATGCGTTGGC   |

58

59 **Table S4 Primer sequences for the construction of expression plasmids**

| Gene          | Primer | Sequences (5' → 3')                                        |
|---------------|--------|------------------------------------------------------------|
| <i>CgCRZ1</i> | C-Sen  | <b>CGGGATCC</b> ATTAGTAGCGATAACGAGTTGGACG ( <i>Bam</i> HI) |
|               | C-Anti | <b>AAGGCCTT</b> GCTGAATATTGCAAAATCTTGT ( <i>Stu</i> I)     |

60

61 **Table S5 The number of colonies in *C. glabrata* strains in YNB-pH 2.0 medium**

| Strain                | 0 h                       | 4 h                       | 8h                        | 12h                       |
|-----------------------|---------------------------|---------------------------|---------------------------|---------------------------|
| <i>wt</i>             | 1.57±0.20×10 <sup>7</sup> | 2.02±0.10×10 <sup>7</sup> | 5.54±0.32×10 <sup>7</sup> | 1.26±0.26×10 <sup>8</sup> |
| <i>Cgcrz1Δ</i>        | 1.27±0.16×10 <sup>7</sup> | 1.96±0.20×10 <sup>7</sup> | 3.20±0.20×10 <sup>7</sup> | 5.15±0.45×10 <sup>7</sup> |
| <i>Cgcrz1Δ/CgCRZ1</i> | 1.50±0.10×10 <sup>7</sup> | 3.56±0.40×10 <sup>7</sup> | 1.96±0.27×10 <sup>8</sup> | 2.40±0.24×10 <sup>9</sup> |

62

63 **Table S6 Differentially expressed genes associated with membrane lipid**

64 **metabolism**

| ORF          | Name | Fold change (Log2)          |                             | Function                                     |
|--------------|------|-----------------------------|-----------------------------|----------------------------------------------|
|              |      | pH= 6.0                     | pH= 2.0                     |                                              |
|              |      | <i>wt</i> vs <i>Cgcrz1Δ</i> | <i>wt</i> vs <i>Cgcrz1Δ</i> |                                              |
| CAGL0L10780g | ACC1 | -3.45382                    | -2.77941                    | Propionyl-CoA carboxylase                    |
| CAGL0L10780g | FAS1 | -3.45382                    | -2.77941                    | Fatty acid synthase subunit                  |
| CAGL0D00528g | FAS2 | -5.09106                    | -3.26536                    | Fatty acid synthase subunit                  |
| CAGL0E06138g | FabF | -3.83228                    | -3.58979                    | Fatty acid synthase subunit                  |
| CAGL0J02970g | FabG | -4.41054                    | -1.84035                    | Fatty acid synthase subunit                  |
| CAGL0M13013g | FabG | -3.96432                    | -1.21719                    | Fatty acid synthase subunit                  |
| CAGL0J04774g | FabG | -2.83553                    | 0                           | Fatty acid synthase subunit                  |
| CAGL0H10450g | FabD | -2.21458                    | -1.53906                    | Fatty acid synthase subunit                  |
| CAGL0L08184g | Elo2 | -4.02847                    | -4.11405                    | Elongation protein of long chain fatty acids |
| CAGL0K00583g | Elo3 | -1.99207                    | -3.29584                    | Elongation protein of long chain fatty acids |

65

66

67 **Table S6 Differentially expressed genes associated with membrane lipid**68 **metabolism (continued table)**

| ORF          | Name      | Fold change (Log2)   |                      | Function                                            |
|--------------|-----------|----------------------|----------------------|-----------------------------------------------------|
|              |           | pH= 6.0              | pH= 2.0              |                                                     |
|              |           | <i>wt vs Cgcrz1Δ</i> | <i>wt vs Cgcrz1Δ</i> |                                                     |
| CAGL0G04851g | Elo3      | 0                    | 1.136983             | Elongation protein of long chain fatty acids        |
| CAGL0J10824g | ERG7      | -1.66053             | 0                    | Lanosterol synthase                                 |
| CAGL0E04334g | CYP51     | 1.136591             | 1.623938             | Sterol 14-demethylase                               |
| CAGL0E05280g | ERG26     | -2.82121             | 0                    | Sterol-4 $\alpha$ -carboxylate 3-dehydrogenase      |
| CAGL0E05170g | ERG26     | -2.78278             | 0                    | Sterol-4 $\alpha$ -carboxylate 3-dehydrogenase      |
| CAGL0M11506g | ERG27     | -1.20818             | 0                    | 3-keto steroid reductase                            |
| CAGL0H04653g | ERG6      | 0                    | 1.137315             | Sterol 24-C-methyltransferase                       |
| CAGL0L10714g | ERG2      | -2.35562             | 0                    | C-8 sterol isomerase                                |
| CAGL0F01793g | ERG3      | 1.748376             | 2.634495             | $\delta$ -7-sterol 5-desaturase                     |
| CAGL0M07656g | ERG5      | 0                    | 1.096274             | Sterol 22-desaturase                                |
| CAGL0A00429g | ERG4      | -1.14096             | 1.449763             | $\delta$ -24(24(1))-sterol reductase                |
| CAGL0C05137g | GPD1      | 1.650682             | 2.18454              | Glycerol-3-phosphate dehydrogenase                  |
| CAGL0I04752g | CDS1      | -2.55371             | -2.23864             | Phosphatidate cytidyltransferase                    |
| CAGL0I09812g | CDS1      | -3.31574             | -2.08754             | Phosphatidate cytidyltransferase                    |
| CAGL0C03069g | CHO1      | -1.6414              | -2.54861             | CDP-diacylglycerol-serine-O-phosphatidyltransferase |
| CAGL0I03784g | CLS       | 0                    | -1.55532             | Cardiolipin synthase A/B                            |
| CAGL0M11462g | CLD1      | -3.06236             | -2.20077             | Cardiolipin-specific phospholipase                  |
| CAGL0B01969g | CLD1      | -5.27799             | -1.77761             | Cardiolipin-specific phospholipase                  |
| CAGL0L04686g | CLD1      | -1.41495             | -1.03389             | Cardiolipin-specific phospholipase                  |
| CAGL0J09416g | PISD      | -3.33089             | -3.26489             | Phosphatidylserine decarboxylase                    |
| CAGL0I08745g | PISD      | -3.17146             | -2.56741             | Phosphatidylserine decarboxylase                    |
| CAGL0K09570g | EPT1      | -2.6578              | -2.38503             | Ethanolamine phosphotransferase                     |
| CAGL0L13068g | EPT1      | -4.8625              | -1.82849             | Ethanolamine phosphotransferase                     |
| CAGL0M04367g | CKI1      | -1.49477             | -2.35888             | Choline kinase                                      |
| CAGL0F08723g | ECT1      | 0                    | 1.093409             | Ethanolamine-phosphate cytidyltransferase           |
| CAGL0J11770g | LYPLA1    | -1.39527             | -1.51419             | Lysophospholipase I                                 |
| CAGL0I06050g | INO1      | -3.64446             | -5.82456             | Myo-inositol-1-phosphate synthase                   |
| CAGL0H01089g | INM1      | -1.57606             | -2.20862             | Myo-inositol-1(or 4)-monophosphatase                |
| CAGL0G08360g | VPS34     | -2.42441             | -1.30054             | Phosphatidylinositol 3-kinase                       |
| CAGL0K00297g | Ins-1,4,5 | -2.86763             | -2.02035             | Inositol-1,4,5-trisphosphate 5-phosphatase          |
| CAGL0J02134g | Ins-1,4,5 | -2.5808              | -1.40713             | Inositol-1,4,5-trisphosphate 5-phosphatase          |
| CAGL0E03201g | PEMT      | -1.68656             | -1.43472             | Phosphatidylethanolamine N-methyltransferase        |

69

70

71 **Table S7 Genes used in the validation of RNAseq data by qRT-PCR**

| ORF          | Gene name   | Protein                                                  | Fold change <sup>a</sup> |                 |
|--------------|-------------|----------------------------------------------------------|--------------------------|-----------------|
|              |             |                                                          | qRT-PCR                  | RNAseq analysis |
| CAGL0D00528g | <i>FAS1</i> | Fatty acid synthase subunit 1                            | -3.03                    | -3.38           |
| CAGL0L08184g | <i>ELO2</i> | Elongation protein of long chain fatty acids             | -5.12                    | -4.11           |
| CAGL0I04752g | <i>CDS1</i> | Phosphatidate cytidylyltransferase                       | -1.90                    | -2.24           |
| CAGL0F01793g | <i>ERG3</i> | $\delta$ -7-sterol 5-desaturase                          | 1.85                     | 2.63            |
| CAGL0E06138g | <i>FAS2</i> | Fatty acid synthase subunit 2                            | -2.38                    | -3.27           |
| CAGL0I06050g | <i>INO1</i> | Myo-inositol-1-phosphate synthase                        | -4.98                    | -5.82           |
| CAGL0C03069g | <i>CHO1</i> | CDP-diacylglycerol---serine<br>O-phosphatidyltransferase | -2.01                    | -2.55           |
| CAGL0J00539g | <i>SLT2</i> | Mitogen-activated protein kinase 7                       | -1.82                    | -2.51           |
| CAGL0G08107g | <i>MSN2</i> | Stress transcription factor                              | -2.92                    | -3.78           |
| CAGL0M04191g | <i>YPS1</i> | a family of 11 GPI-linked aspartyl<br>proteases          | -2.57                    | -3.78           |

72 <sup>a</sup> Fold change: values represent fold change when *Cgcrz1Δ* was treated with acid stress for 6 h.

73

74 **Table S8 Primers used in qRT-PCR verification**

| Gene        | Primer          | Sequences (5'→ 3')  |
|-------------|-----------------|---------------------|
| <i>FAS1</i> | <i>FAS1-S</i>   | GGATGAAGCCTACTGGTT  |
|             | <i>FAS1-A</i>   | CCTTTCTTGCTGGATTTT  |
| <i>ELO2</i> | <i>ELOVL2-S</i> | TGGTGGAAAGGAATGGGTC |
|             | <i>ELOVL2-A</i> | TGTGGCAGAGTTGGGAAG  |
| <i>CDS1</i> | <i>CDS1-S</i>   | GGTGGTTTCTTTGCTTCA  |
|             | <i>CDS1-A</i>   | ACAATCAACTCTGTCCGTA |
| <i>ERG3</i> | <i>ERG3-S</i>   | CTTGACTGTCCCTTGGTT  |
|             | <i>ERG3-A</i>   | AAGATGAAAGTGCGTAC   |
| <i>FAS2</i> | <i>FAS2-S</i>   | CCTTTCTTGCTGGATTTT  |
|             | <i>FAS2-A</i>   | GTAAACGGTAAACCAACA  |
| <i>INO1</i> | <i>INO1-S</i>   | TATGGACCGCTAACACCG  |
|             | <i>INO1-A</i>   | ATGGAAGCAGCAGCAAAG  |
| <i>CHO1</i> | <i>CHO1-S</i>   | GTCAACTACCCAAGGACG  |

75

76 **Table S8 Primers used in qRT-PCR verification (continued table)**

| <b>Gene</b>    | <b>Primer</b>     | <b>Sequences (5'→ 3')</b>   |
|----------------|-------------------|-----------------------------|
| <i>CHO1</i>    | <i>CHO1-A</i>     | GGCAAATATCCTAACAAATC        |
| <i>SLT2</i>    | <i>SLT2-S</i>     | GCGTGAACGAAATGGAAG          |
|                | <i>SLT2-A</i>     | TGGGCTTGTCTGTTGGTAAT        |
| <i>MSN2</i>    | <i>MSN2-S</i>     | GGCAAATATCCTAACAAATC        |
|                | <i>MSN2-A</i>     | TCTGAGCTTCTTCGCAAC          |
| <i>YPS1</i>    | <i>YPS1-S</i>     | CGCCCTATTGGACTCTGG          |
|                | <i>YPS1-A</i>     | TCATCGGACTGGCTTGG           |
| <i>CRZ1</i>    | <i>CRZ1-S</i>     | <b>GATGCTGAAACGCTACTAAA</b> |
|                | <i>CRZ1-A</i>     | <b>AGCCCGATGGTGACGAA</b>    |
| <i>β-ACTIN</i> | <i>β-ACTIN -S</i> | ACCGCTGCTCAATCTTCC          |
|                | <i>β-ACTIN -A</i> | TCCTTACGAACATCAACATCAC      |

77

78

79 **The validation of correct integration of *CgCRZI* fragments by sequencing.**

80 **1. *CgCRZI* gene knock out frame (DNA sequence)**

81 GATGTTTGGCACATATGCCTCGATGTAGATATAGACCACTAGCTATTCATAGGTTACATA

82 CGTATATGCCCATATCCATATAGCAATTCATCAACCTTTGCAGCCAGAGGGACCCTTCCC

83 CCATCCAGTGATCCCACTTTTGCCGAACTTGGTCACTTTTCTTGCAGGAAAAATTATCC

84 CGGTGAGTCCTCCGAAAAGCTCAGTTTCCTTGTAATTACTTGTACAGCACAATGAAGG

85 CTTATAATAGCAAAAACTTCAAATTAGTAGCGATAACGAGTTGGACGCCCTCTTTTG

86 GAAGTCTGTTCTGGTTGCAGATGCTTATAGACCCTGGATCAAGCACTTCATTTCAATGG

87 GATTACAGCTTTTCGTTGTAGAAGAAGGCTTTTAACTAACTTGCAAGAGCAACAACCTC

88 CACTTGGGAAGGGTTTTCTGTCAAACCACTGCTAACCTGGTTTTCTTTTTTTGTAAGCA

89 AACTGGAAATAACATTTGCTGAGTTGCACAACTTCACATTAAGTTTTAGAGTTTGATA

90 GACAGTTTTCTTTTAATCTTTTTTTTCACATTGGGAGCATACTATACAAGATTTTGCAAT

91 ATTCAGCAATGGCGTTTGTTAAGAGGGTTACGCAGGAGACGAATATACAGCTGGCGCT

92 GGATCTTGACGGTGGGTCTGTTTCTGTACGGGAGAGCATACTGGGCAAGGAATATGCT

93 AGTGGTGATGGGCAGACCATCCATGTGCACACTGGAGTTGGGTTTTTGGACCACATGT

94 TGA CTGCGCTGGCGAAGCATGGCGGGTGGTCTCTGATCCTGGAGTGTATAGGGGACTT

95 GCACATCGATGACCACCACACTGTTGAGGACTGTGGGATTGCGCTGGGCCAAGCGTTC

96 AAGGAGGCGCTTGGCTCCGTGCGTGGTATCAAGAGGTTTCGGGCATGGGTTTGCACCAC

97 TGGACGAGGCGCTGAGCCGCGCTGTGGTTGACTTCTCCAATAGGCCTTTCGCCGTGGT

98 GGAGCTGGGCCTGAAGCGAGAACGCATAGGCCAGCTATCCACAGAGATGATCCCGCA

99 CTTCTTGGAGAGTTTCGCCACTGAGGCGCGTATCACCATGCATGTGGACTGTCTGCGG

100 GGCACCAACGACCACCACCGCTCCGAATCAGCTTTC AAGGCGCTCGCCATCGCCATCA



101 GAGAGGCAAGAACACCTACGGGTCGCGATGACGTTCCATCCACTAAGGGTGTCCCTAGC  
102 ATAGATTAACACAAACCTCCAGTATTTTTAATGATAAATTTTTTTCTTCAGAATCAAGAT  
103 TGTGATGAGATATAAGCATAAAGATCATAAGATAGTTGGTAATTACAAGGAGATTAACAT  
104 CCTGATATAAGGCAGTTTTAAATACAAAAGTCTATATAAACTACTTAAATAGAGTTGTAA  
105 CAATATTGGGCACTATTACTATAGCAATAGTTATTTATTTTCGAATATTTTTATGTACGGAA  
106 AAGATAGGGACTCTAAATATTTCAAACAAATGAAATTTAGTCAAAGCAAGACATGCAT  
107 AAGGGCATCGATCACAGTGGCTAGCACGTATGGGTCCTAAATTTATTTCAAATTTGTCA  
108 AAAGGTTTAGGAATTAACCACTGAACTGTTGAAAATAATCTAGTCTGTTCCCTAAAGTCA  
109 GTTCAATTAGCACTTCCAGTTGTTTGAATCTAAGGAAATAAGGGGTTGCCAACGCATTT  
110 AAGACAAATTAAGTAACTATCAGTTAAACAAAATATAGTTCATGATGTCAGCATCTGAT  
111 GATCAGTTGCAAGCAGAACTACAAGCCGAATTACAAAGGTTTCAAACCTTTCAGAATG  
112 GTTTGTGTA

113 **2. The verified gene sequence of the *CgCRZI* gene deleted mutant strain**

114 TACGTATATGCCATATCCATATAGCAATTCATCAACCTTTGCAGCCAGAGGGACCCTTC  
115 CCCCATCCAGTGATCCCCTTTTGCCGAACCTTGGTCACTTTTCTTGCAGGAAAAATTAT  
116 CCCGGTGAGTCCTCCGAAAAGCTCAGTTTCCTTGTAATTACTTGTACAGCACAATGAAG  
117 GCTTATAATAGCAAAAACTTCAAATTAGTAGCGATAACGAGTTGGACGCCCTCTTTT  
118 GGAAGTCTGTTCTGGTTGCAGATGCTTATAGACCCTGGATCAAGCACTTCATTTTCATTG  
119 GGATTACAGCTTTTCGTTGTAGAAGAAGGCTTTTAACTAACTTGCAAGAGCAACAAC  
120 CCACTTGGAAGGGTTTTCTGTCAAACCACTGCTAACCTGGTTTCTTTTTTTGTAAAGC  
121 AAACTGGAAATAACATTTGCTGAGTTGCACAACTTCACATTAAGTTTTAGAGTTTGAT  
122 AGACAGTTTTCTTTTAATCTTTTTTTTTCACATTTGGGAGCATACTATACAAGATTTTGCA

123 ATATTCAGCAATGGCGTTTGTAAAGAGGGTTACGCAGGAGACGAATATACAGCTGGCGC  
124 TGGATCTTGACGGTGGGTCTGTTTCTGTACGGGAGAGCATACTGGGCAAGGAATATGCT  
125 AGTGGTGATGGGCAGACCATCCATGTGCACACTGGAGTTGGGTTTTTGGACCACATGT  
126 TGA CTGCGCTGGCGAAGCATGGCGGGTGGTCTCTGATCCTGGAGTGTATAGGGGACTT  
127 GCACATCGATGACCACCACACTGTTGAGGACTGTGGGATTGCGCTGGGCCAAGCGTTC  
128 AAGGAGGCGCTTGGCTCCGTGCGTGGTATCAAGAGGTTCCGGGCATGGGTTTGCACCAC  
129 TGGACGAGGCGCTGAGCCGCGCTGTGGTTGACTTCTCCAATAGGCCTTTCGCCGTGGT  
130 GGAGCTGGGCCTGAAGCGAGAACGCATAGGCCAGCTATCCACAGAGATGATCCCGCA  
131 CTTCTTGGAGAGTTTCGCCACTGAGGCGCGTATCACCATGCATGTGGACTGTCTGCGG  
132 GGCACCAACGACCACCACCGCTCCGAATCAGCTTTCAAGGCGCTCGCCATCGCCATCA  
133 GAGAGGCAAGAACACCTACGGGTCGCGATGACGTTCCATCCACTAAGGGTGTCTTAGC  
134 ATAGATTAACACAAACCTCCAGTATTTTAAATGATAAATTTTTTCTTCAGAATCAAGAT  
135 TGTGATGAGATATAAGCATAAAGATCATAAGATAGTTGGTAATTACAAGGAGATTAACAT  
136 CCTGATATAAGGCAGTTTTAAATACAAAAGTCTATATAAACTACTTAAATAGAGTTGTAA  
137 CAATATTGGGCACTATTACTATAGCAATAGTTATTTATTTTCGAATATTTTTATGTACGGAA  
138 AAGATAGGGACTCTAAATATTTCAAACAAATGAAATTTAGTCAAAGCAAGACATGCAT  
139 AAGGGCATCGATCACAGTGGCTAGCACGTATGGGTCCTAAATTTATTTCAA AATTGTCA  
140 AAAGGTTTAGGAATTAACCACTGAACTGTTGAAAATAATCTAGTCTGTTCCCTAAAGTCA  
141 GTTCAATT  
142

143

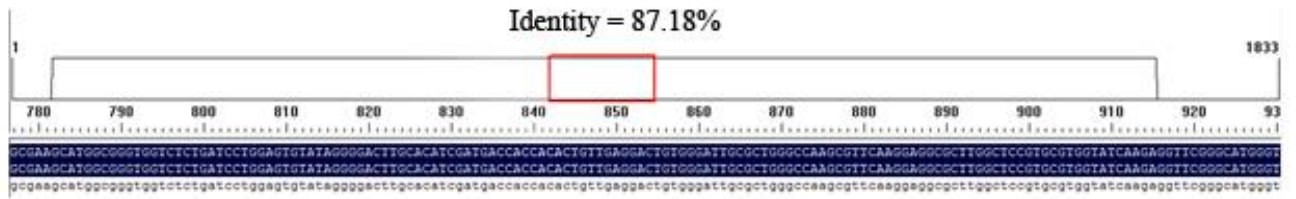

144

145

Figure S1 Correct integration of CRZ1 fragments

146

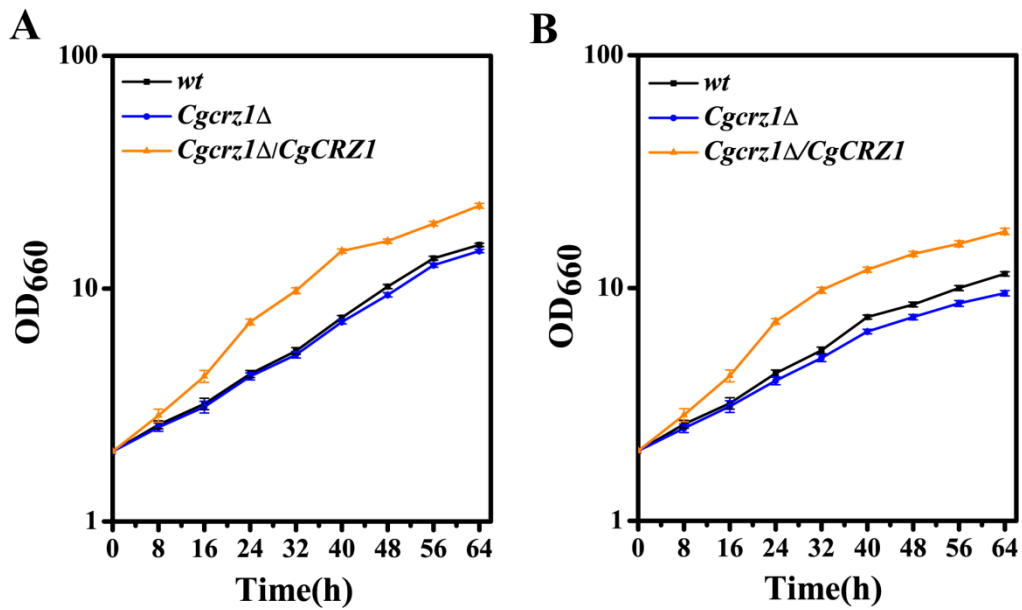

147

Figure S2 The growth curve of wild type, *Cgcrz1Δ* and *Cgcrz1Δ/CgCRZ1* strains

during pyruvate production (A) with CaCO<sub>3</sub>; (B) without CaCO<sub>3</sub>. All data are

represented as mean values of three independent experiments.

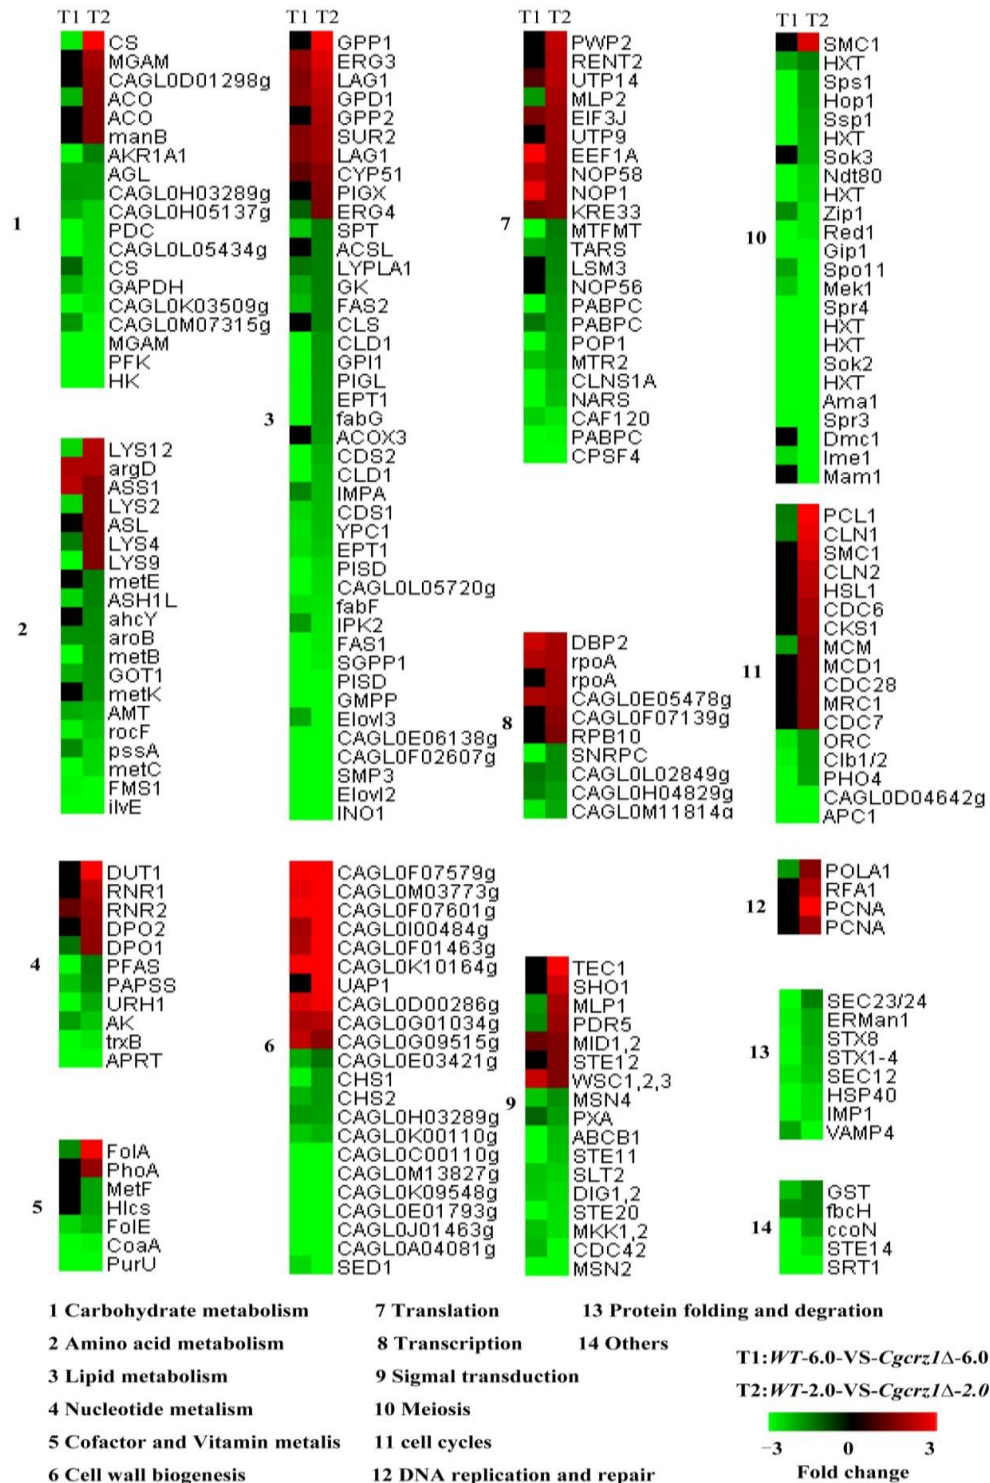

156

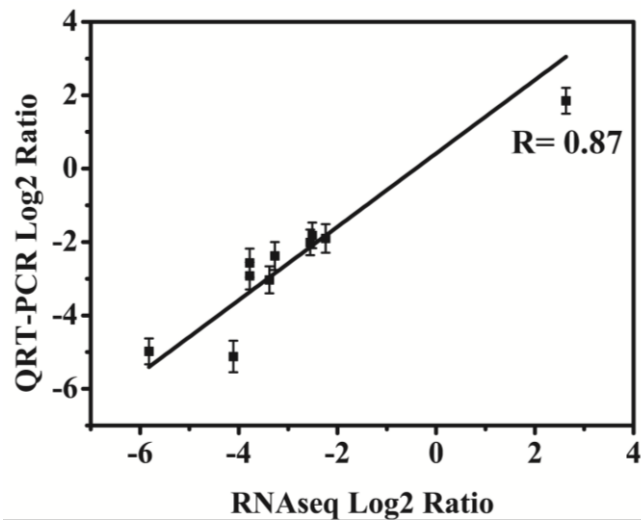

157

158 **Figure S4 qRT-PCR verification of RNA-seq data from *Cgcrz1Δ* strain at**

159

**YNB-pH 2.0**

160

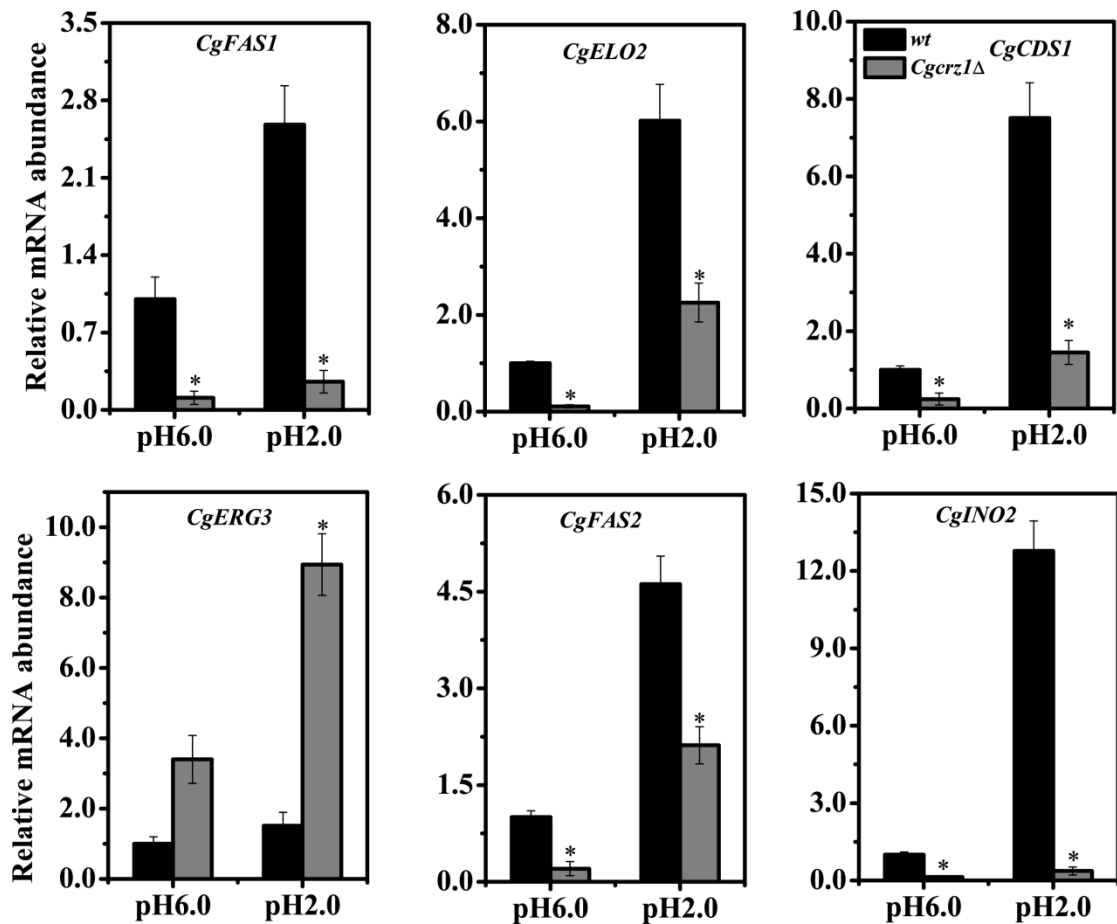

161

162 **Figure S5 qRT-PCR verification of RNA-seq data involved in plasma membrane**

163 **lipid metabolism.** Log-phase *C. glabrata* cells were cultured in YNB-pH6.0 and

164 YNB-pH2.0 medium for 6h. The means and standard deviations for three independent

165 experiments are shown. Error bars represent standard deviations. (\*P < 0.05 compared

166 to the corresponding wild-type strain, as determined by t-test).

167

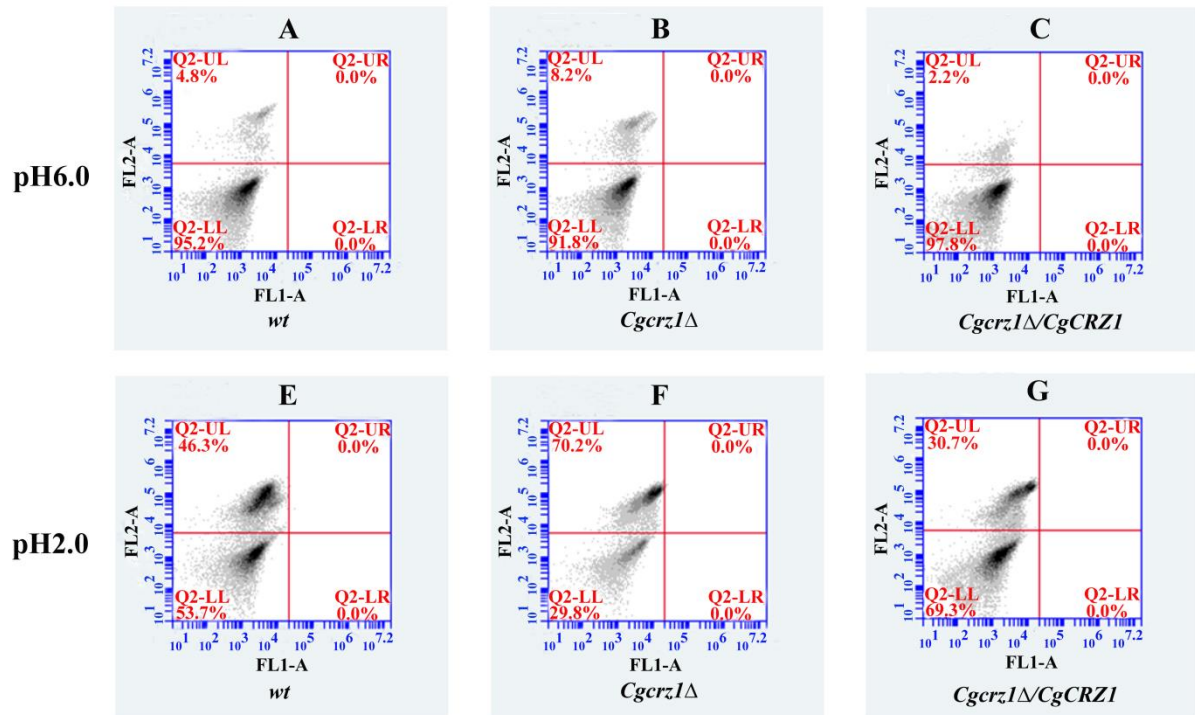

168

169 **Figure S6** Flow cytometry analyses of *C. glabrata* at pH 6.0 and pH 2.0. (A) the  
 170 wide-type strains at pH 6.0; (B) the *Cgcrz1Δ* mutants at pH 6.0; (C) the overexpressed  
 171 strain *Cgcrz1Δ/CgCRZI* at pH 6.0; (D) the wide-type strains at pH 2.0; (E) the  
 172 *Cgcrz1Δ* mutants at pH 2.0; (F) the overexpressed strain *Cgcrz1Δ/CgCRZI* at pH 2.0.  
 173 Q2-UL region: the percentage of PI-stained yeast cell, suggesting that cell membrane  
 174 was destroyed by low pH stimulia; Q2-LL region: the percentage of PI-unstained  
 175 yeast cell, suggesting that cell membrane was intact in low pH enviroment.

176

177 **The *CgCRZI* expression level in the wide type, *Cgcrz1Δ* and *Cgcrz1Δ/CgCRZI***  
 178 **strains**

179 In order to determine the expression level of *CgCRZI* in the wide type, *Cgcrz1Δ*  
 180 and *Cgcrz1Δ/CgCRZI* strains the *Cgcrz1Δ/CgCRZI* strains, cells grown in the  
 181 logarithmic phase in YNB were extracted and then diluted in fresh medium at pH 6.0  
 182 or pH 2.0 to  $A_{600}=0.1$ . Then the three different type cells were cultured for 4 h, total  
 183 RNA was extracted using the MiniBEST Universal RNA Extraction Kit and 1  $\mu$ g was

184 used to synthesize cDNA with the Primer Script II 1st Strand cDNA Synthesis Kit  
 185 (TaKaRa). The cDNA mixture was diluted to ~100 ng/ $\mu$ L and used for qRT-PCR with  
 186 SYBR Premix Extaq (TaKaRa) on an iQ5 Continuous Fluorescence Detector System  
 187 (Bio-Rad, Hercules, CA, USA). Data were normalized to the actin gene. The primers  
 188 used for qRT-PCR verification are given in Table S8 in supplemental material.

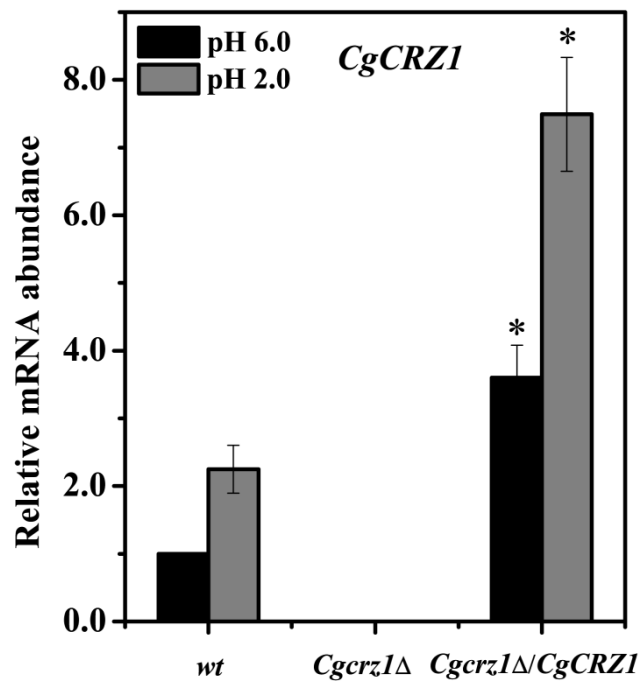

189

190 **Figure S7 The expression level of *CgCRZI* in the wide type, *Cgcrz1*Δ and**

191

***Cgcrz1*Δ/*CgCRZI* strains**

192 Log-phase *C.glabrata* cells were cultured in YNB-pH6.0 and YNB-pH2.0 medium for

193 4 h. The means and standard deviations for three independent experiments are shown.

194 Error bars represent standard deviations. (\* $P < 0.05$  compared to the corresponding

195 wild-type control, as determined by t-test).

196 **The detailed description of Fig 6A in supplemental material**

197 Phospholipid, glycolipid and cholesterol are the major lipids in the plasma

198 membrane and fatty acid acyl chains serve as precursors for phospho- or glycolipids.



199 Glycerophospholipid and sphingomyelin constitute the phospholipid bilayer, which is  
 200 a fundamental membrane structure. Glycolipid signaling chains are embedded in its  
 201 surface and ergosterol-enriched membrane domains are distributed within the  
 202 transbilayer. Phospholipid molecules included phosphatidylcholine (PC),  
 203 phosphatidylethanolamine (PE), phosphatidylserine (PS), phosphatidylinositol,  
 204 (PI), phosphatidylglycerol (PG) and phosphatidic acid (PA).

205 **Corrected description of transcriptome data**

206 The accession is [SRP068794](#), for the sample [SAMN04435264](#).

|                                                                                        |                                                                                                           |                                              |                                                                                    |
|----------------------------------------------------------------------------------------|-----------------------------------------------------------------------------------------------------------|----------------------------------------------|------------------------------------------------------------------------------------|
| <b>The old library name</b>                                                            | the Cgcrz1-pH 2.0-6h                                                                                      | <b>The new (corrected) library name</b>      | RNAseq of <i>Candida glabrata</i> under acidic conditions                          |
| <b>The old library instrument</b>                                                      | Illumina HiSeq 2000                                                                                       | <b>The new (corrected) instrument</b>        | Illumina HiSeq 2500                                                                |
| <b>The old library selection</b>                                                       | RANDOM                                                                                                    | <b>The new (corrected) library selection</b> | RT-PCR                                                                             |
| <b>The old Sample Organism</b>                                                         | <i>Saccharomyces</i>                                                                                      | <b>The new (corrected) Sample Organism</b>   | <i>Candida glabrata</i>                                                            |
| <b>The old Abstract</b>                                                                | to study the mechanism that <i>Candida glabrata</i> responds to the acid stimuli at transcriptional level | <b>The new (corrected) Abstract</b>          | Identify the function of transcription factor CgCrz1p in regulating pH homeostasis |
| <b>For corrections of the sample <a href="#">SAMN04435264</a> in Biosample section</b> |                                                                                                           |                                              |                                                                                    |
| <b>The old Sample Organism</b>                                                         | <i>Saccharomyces</i>                                                                                      | <b>The new (corrected) Sample Organism</b>   | <i>Candida glabrata</i>                                                            |
| <b>The old Package</b>                                                                 | <a href="#">Microbe; version 1.0</a>                                                                      | <b>The new Package</b>                       | <a href="#">Pathogen: clinical or host-associated; version 1.0</a>                 |
| <b>Attributes</b>                                                                      |                                                                                                           |                                              |                                                                                    |
| <b>The old strain</b>                                                                  | <i>Candida glabrata</i>                                                                                   | <b>The new strain</b>                        | <i>Candida glabrata</i> gene CgCRZ1 deletion strain                                |

207  
208

209 The accession is SRP068794, for the sample SAMN04435263.

|                                                                               |                                                                                                           |                                              |                                                                                    |
|-------------------------------------------------------------------------------|-----------------------------------------------------------------------------------------------------------|----------------------------------------------|------------------------------------------------------------------------------------|
| <b>The old library name</b>                                                   | the Cgcrz1-pH 6.0-6h                                                                                      | <b>The new (corrected) library name</b>      | RNAseq of <i>Candida glabrata</i> under acidic conditions                          |
| <b>The old library instrument</b>                                             | Illumina HiSeq 2000                                                                                       | <b>The new (corrected) instrument</b>        | Illumina HiSeq 2500                                                                |
| <b>The old library selection</b>                                              | RANDOM                                                                                                    | <b>The new (corrected) library selection</b> | RT-PCR                                                                             |
| <b>The old Sample Organism</b>                                                | <u><i>Saccharomyces</i></u>                                                                               | <b>The new (corrected) Sample Organism</b>   | <u><i>Candida glabrata</i></u>                                                     |
| <b>The old Abstract</b>                                                       | to study the mechanism that <i>Candida glabrata</i> responds to the acid stimuli at transcriptional level | <b>The new (corrected) Abstract</b>          | Identify the function of transcription factor CgCrz1p in regulating pH homeostasis |
| <b>For corrections of the sample <u>SAMN04435264</u> in Biosample section</b> |                                                                                                           |                                              |                                                                                    |
| <b>The old Sample Organism</b>                                                | <u><i>Saccharomyces</i></u>                                                                               | <b>The new (corrected) Sample Organism</b>   | <u><i>Candida glabrata</i></u>                                                     |
| <b>The old Package</b>                                                        | <u>Microbe; version 1.0</u>                                                                               | <b>The new Package</b>                       | <u>Pathogen: clinical or host-associated; version 1.0</u>                          |
| <b>Attributes</b>                                                             |                                                                                                           |                                              |                                                                                    |
| <b>The old strain</b>                                                         | <i>Candida glabrata</i>                                                                                   | <b>The new strain</b>                        | <i>Candida glabrata</i> gene CgCRZ1 deletion strain                                |

210

211

212

213

214

215

216

217

218

219 The accession is SRP068794, for the sample SAMN04435262.

|                                                                               |                                                                                                           |                                              |                                                                                    |
|-------------------------------------------------------------------------------|-----------------------------------------------------------------------------------------------------------|----------------------------------------------|------------------------------------------------------------------------------------|
| <b>The old library name</b>                                                   | WT-pH 2.0                                                                                                 | <b>The new (corrected) library name</b>      | RNAseq of <i>Candida glabrata</i> under acidic conditions                          |
| <b>The old library instrument</b>                                             | Illumina HiSeq 2000                                                                                       | <b>The new (corrected) instrument</b>        | Illumina HiSeq 2500                                                                |
| <b>The old library selection</b>                                              | RANDOM                                                                                                    | <b>The new (corrected) library selection</b> | RT-PCR                                                                             |
| <b>The old Sample Organism</b>                                                | <u><i>Saccharomyces</i></u>                                                                               | <b>The new (corrected) Sample Organism</b>   | <u><i>Candida glabrata</i></u>                                                     |
| <b>The old Abstract</b>                                                       | to study the mechanism that <i>Candida glabrata</i> responds to the acid stimuli at transcriptional level | <b>The new (corrected) Abstract</b>          | Identify the function of transcription factor CgCrz1p in regulating pH homeostasis |
| <b>For corrections of the sample <u>SAMN04435264</u> in Biosample section</b> |                                                                                                           |                                              |                                                                                    |
| <b>The old Sample Organism</b>                                                | <u><i>Saccharomyces</i></u>                                                                               | <b>The new (corrected) Sample Organism</b>   | <u><i>Candida glabrata</i></u>                                                     |
| <b>The old Package</b>                                                        | <u>Microbe; version 1.0</u>                                                                               | <b>The new Package</b>                       | <u>Pathogen: clinical or host-associated; version 1.0</u>                          |
| <b>Attributes</b>                                                             |                                                                                                           |                                              |                                                                                    |
| <b>The old strain</b>                                                         | <i>Candida glabrata</i>                                                                                   | <b>The new strain</b>                        | <i>Candida glabrata</i> ATCC 55                                                    |

220

221

222

223

224

225

226

227

228

229 The accession is SRP068794, for the sample SAMN04435261.

|                                                                               |                                                                                                           |                                              |                                                                                    |
|-------------------------------------------------------------------------------|-----------------------------------------------------------------------------------------------------------|----------------------------------------------|------------------------------------------------------------------------------------|
| <b>The old library name</b>                                                   | the wide-type strains at pH 6.0                                                                           | <b>The new (corrected) library name</b>      | RNAseq of <i>Candida glabrata</i> under acidic conditions                          |
| <b>The old library instrument</b>                                             | Illumina HiSeq 2000                                                                                       | <b>The new (corrected) instrument</b>        | Illumina HiSeq 2500                                                                |
| <b>The old library selection</b>                                              | RANDOM                                                                                                    | <b>The new (corrected) library selection</b> | RT-PCR                                                                             |
| <b>The old Sample Organism</b>                                                | <u><i>Saccharomyces</i></u>                                                                               | <b>The new (corrected) Sample Organism</b>   | <u><i>Candida glabrata</i></u>                                                     |
| <b>The old Abstract</b>                                                       | to study the mechanism that <i>Candida glabrata</i> responds to the acid stimuli at transcriptional level | <b>The new (corrected) Abstract</b>          | Identify the function of transcription factor CgCrz1p in regulating pH homeostasis |
| <b>For corrections of the sample <u>SAMN04435264</u> in Biosample section</b> |                                                                                                           |                                              |                                                                                    |
| <b>The old Sample Organism</b>                                                | <u><i>Saccharomyces</i></u>                                                                               | <b>The new (corrected) Sample Organism</b>   | <u><i>Candida glabrata</i></u>                                                     |
| <b>The old Package</b>                                                        | <u>Microbe; version 1.0</u>                                                                               | <b>The new Package</b>                       | <u>Pathogen: clinical or host-associated; version 1.0</u>                          |
| <b>Attributes</b>                                                             |                                                                                                           |                                              |                                                                                    |
| <b>The old strain</b>                                                         | <i>Candida glabrata</i>                                                                                   | <b>The new strain</b>                        | <i>Candida glabrata</i> ATCC 55                                                    |

230 1. **Wu SX, Letchworth GJ.** 2004. High efficiency transformation by electroporation of  
 231 *Pichia pastoris* pretreated with lithium acetate and dithiothreitol. BioTechniques  
 232 **36**:152-154.

233 2. **Roetzer A, Gregori C, Jennings AM, Quintin J, Ferrandon D, Butler G, Kuchler K,**  
 234 **Ammerer G, Schueller C.** 2008. *Candida glabrata* environmental stress response  
 235 involves *Saccharomyces cerevisiae* Msn2/4 orthologous transcription factors. Mol  
 236 Microbiol **69**:603-620.

237
